# Supplementary material
Source: PubMed Central journal article supplement (PMC4788022)
Supplement: garl834911.ww1_default.pdf [file garl834911.ww1_default.pdf]

## Appendix A. Supplemental tables [posted as supplied by author]

**Table A.** Incidence of myocardial infarction and death due to coronary heart disease stratified by follow-up time.

|                                | MI/CHD death |                     | Non-fatal MI |                    | CHD death |                    |
|--------------------------------|--------------|---------------------|--------------|--------------------|-----------|--------------------|
|                                | N            | Incidence (95% CI)  | N            | Incidence (95% CI) | N         | Incidence (95% CI) |
| <b>Total follow-up period</b>  | 1222         | 9.58 (9.06–10.14)   | 876          | 6.87 (6.43–7.34)   | 346       | 2.71 (2.44–3.02)   |
| <b>First year of follow-up</b> | 451          | 12.92 (11.78–14.17) | 324          | 9.28 (8.32–10.35)  | 127       | 3.64 (3.06–4.33)   |
| <b>Rest of follow-up</b>       | 771          | 8.33 (7.76–8.94)    | 552          | 5.96 (5.48–6.48)   | 219       | 2.37 (2.07–2.70)   |

NOTE: incidence is given per 1000 person-years.

**Table B.** Incidence of myocardial infarction and death due to coronary heart disease according to sex, age and low-dose acetylsalicylic acid indication.

|                                            | MI/CHD death |                     | Non-fatal MI |                    | CHD death |                    |
|--------------------------------------------|--------------|---------------------|--------------|--------------------|-----------|--------------------|
|                                            | N            | Incidence (95% CI)  | N            | Incidence (95% CI) | N         | Incidence (95% CI) |
| <b>Sex</b>                                 |              |                     |              |                    |           |                    |
| Male (N = 22 122)                          | 810          | 11.41 (10.65–12.22) | 566          | 7.97 (7.34–8.66)   | 244       | 3.44 (3.03–3.90)   |
| Female (N = 17 391)                        | 412          | 7.29 (6.62–8.03)    | 310          | 5.49 (4.91–6.13)   | 102       | 1.81 (1.49–2.19)   |
| <b>Age<sup>a</sup></b>                     |              |                     |              |                    |           |                    |
| 50–64 years (N = 14 754)                   | 357          | 7.07 (6.37–7.84)    | 282          | 5.59 (4.97–6.28)   | 75        | 1.49 (1.18–1.86)   |
| 65–74 years (N = 13 715)                   | 447          | 9.28 (8.46–10.18)   | 337          | 7.00 (6.29–7.78)   | 110       | 2.28 (1.89–2.75)   |
| 75–84 years (N = 11 044)                   | 418          | 14.49 (13.16–15.95) | 257          | 8.91 (7.88–10.07)  | 161       | 5.58 (4.78–6.51)   |
| <b>Low-dose acetylsalicylic indication</b> |              |                     |              |                    |           |                    |
| CVD (N = 12 771)                           | 267          | 6.82 (6.05–7.69)    | 179          | 4.57 (3.95–5.29)   | 88        | 2.25 (1.82–2.77)   |
| IHD (N = 16 592)                           | 530          | 9.01 (8.27–9.81)    | 391          | 6.65 (6.02–7.34)   | 139       | 2.36 (2.00–2.79)   |
| UA (N = 764)                               | 37           | 14.66 (10.62–20.22) | 27           | 10.69 (7.33–15.59) | 10        | 3.96 (2.13–7.36)   |
| MI (N = 9386)                              | 388          | 14.38 (13.02–15.88) | 279          | 10.34 (9.19–11.63) | 109       | 4.04 (3.35–4.87)   |

<sup>a</sup>Age at the start of follow-up.

CVD, cerebrovascular disease; IHD, ischaemic heart disease; MI, myocardial infarction; UA, unstable angina.

NOTE: incidence is given per 1000 person-years.

**Table C.** Relative risk of myocardial infarction and death due to coronary heart disease according to discontinuation of other medications.

|                                                              | <b>Controls</b><br>N = 5000 | <b>MI/CHD cases</b><br>N = 1222 | <b>Crude RR<sup>a</sup></b><br>(95% CI) | <b>RR<sup>b</sup> (95% CI)</b> |
|--------------------------------------------------------------|-----------------------------|---------------------------------|-----------------------------------------|--------------------------------|
| <b>Inhaled beta-agonists</b>                                 |                             |                                 |                                         |                                |
| Current (use on index date)                                  | 361 (7.2)                   | 129 (10.6)                      | 1 (–)                                   | 1 (–)                          |
| Indeterminate (stopped 1–30 days before index date)          | 92 (1.8)                    | 27 (2.2)                        | 0.81 (0.50–1.29)                        | 0.94 (0.57–1.57)               |
| Recent discontinuers (stopped 31–180 days before index date) | 165 (3.3)                   | 49 (4.0)                        | 0.85 (0.58–1.24)                        | 1.05 (0.70–1.58)               |
| Past discontinuers (stopped 181–365 days before index date)  | 76 (1.5)                    | 20 (1.6)                        | 0.77 (0.45–1.32)                        | 1.02 (0.57–1.82)               |
| <b>Inhaled steroids</b>                                      |                             |                                 |                                         |                                |
| Current (use on index date)                                  | 244 (4.9)                   | 95 (7.8)                        | 1 (–)                                   | 1 (–)                          |
| Indeterminate (stopped 1–30 days before index date)          | 91 (1.8)                    | 30 (2.5)                        | 0.86 (0.53–1.39)                        | 0.93 (0.56–1.55)               |
| Recent discontinuers (stopped 31–180 days before index date) | 132 (2.6)                   | 25 (2.1)                        | 0.50 (0.30–0.81)                        | 0.58 (0.35–0.98)               |
| Past discontinuers (stopped 181–365 days before index date)  | 28 (0.6)                    | 9 (0.7)                         | 0.86 (0.39–1.90)                        | 1.28 (0.56–2.92)               |
| <b>Insulin</b>                                               |                             |                                 |                                         |                                |
| Current (use on index date)                                  | 137 (2.7)                   | 58 (4.8)                        | 1 (–)                                   | 1 (–)                          |
| Indeterminate (stopped 1–30 days before index date)          | 11 (0.2)                    | 2 (0.2)                         | 0.44 (0.09–2.07)                        | 0.63 (0.13–3.01)               |
| Recent discontinuers (stopped 31–180 days before index date) | 10 (0.2)                    | 2 (0.2)                         | 0.48 (0.10–2.25)                        | 0.42 (0.08–2.20)               |
| Past discontinuers (stopped 181–365 days before index date)  | 4 (0.1)                     | 0 (–)                           | –                                       | –                              |
| <b>PPIs</b>                                                  |                             |                                 |                                         |                                |
| Current (use on index date)                                  | 770 (15.40)                 | 264 (21.60)                     | 1 (–)                                   | 1 (–)                          |
| Indeterminate (stopped 1–30 days before index date)          | 148 (2.96)                  | 47 (3.85)                       | 0.92 (0.64–1.32)                        | 0.88 (0.60–1.29)               |
| Recent discontinuers (stopped 31–180 days before index date) | 168 (3.36)                  | 46 (3.76)                       | 0.80 (0.56–1.14)                        | 0.90 (0.61–1.31)               |
| Past discontinuers (stopped 181–365 days before index date)  | 120 (2.40)                  | 16 (1.31)                       | 0.38 (0.22–0.66)                        | 0.41 (0.23–0.72)               |

<sup>a</sup>Adjusted for the matched variables: sex, age and calendar year

<sup>b</sup>Adjusted for age, sex, calendar year, time to event, smoking, ischaemic heart disease (at start date), cerebrovascular disease (at start date), diabetes (at start date), chronic obstructive pulmonary disease (at start date), and use of clopidogrel, statins, anticoagulants, nitrates, antihypertensives, oral steroids, non-steroidal anti-inflammatory drugs and acetylsalicylic acid.

**Note:** To calculate the estimate of oral antidiabetics as well as insulin we removed diabetes from the multivariable model.
